# Supplementary material
Source: PubMed Central journal article supplement (PMC2953643)

## Figure S1

### Gal-1

MACGLVASNLNLKPGECLKVRGEVASDAKSFVLNLGKDSNNLCLHFNPRFNAHGDANTIVCNTKEDGTWGTEHREPAFPFQPGSITEVCITF  
DQADLTIKLPDGHEFKFPNRLNMEAINYMAADGDFKIKCVAFE

### mGal-1

MACGLVASNLNLKPGECLKVRGEVASDAKSFVLNLGKDSNNLCLHFNPRFNAHGDANTIVCNTKEDGT**G**GTEHREPAFPFQPGSITEVCITF  
DQADLTIKLPDGHEFKFPNRLNMEAINYMAADGDFKIKCVAFE

### dmGal-1

MACGLVASNLNLKPGECLKVRGEVASDAKSFVLNLGKDSNNLCL**L**FNPRFNAHGDANTIVCNTKEDGT**G**GTEHREPAFPFQPGSITEVCITF  
DQADLTIKLPDGHEFKFPNRLNMEAINYMAADGDFKIKCVAFE

**Figure S2A-D**

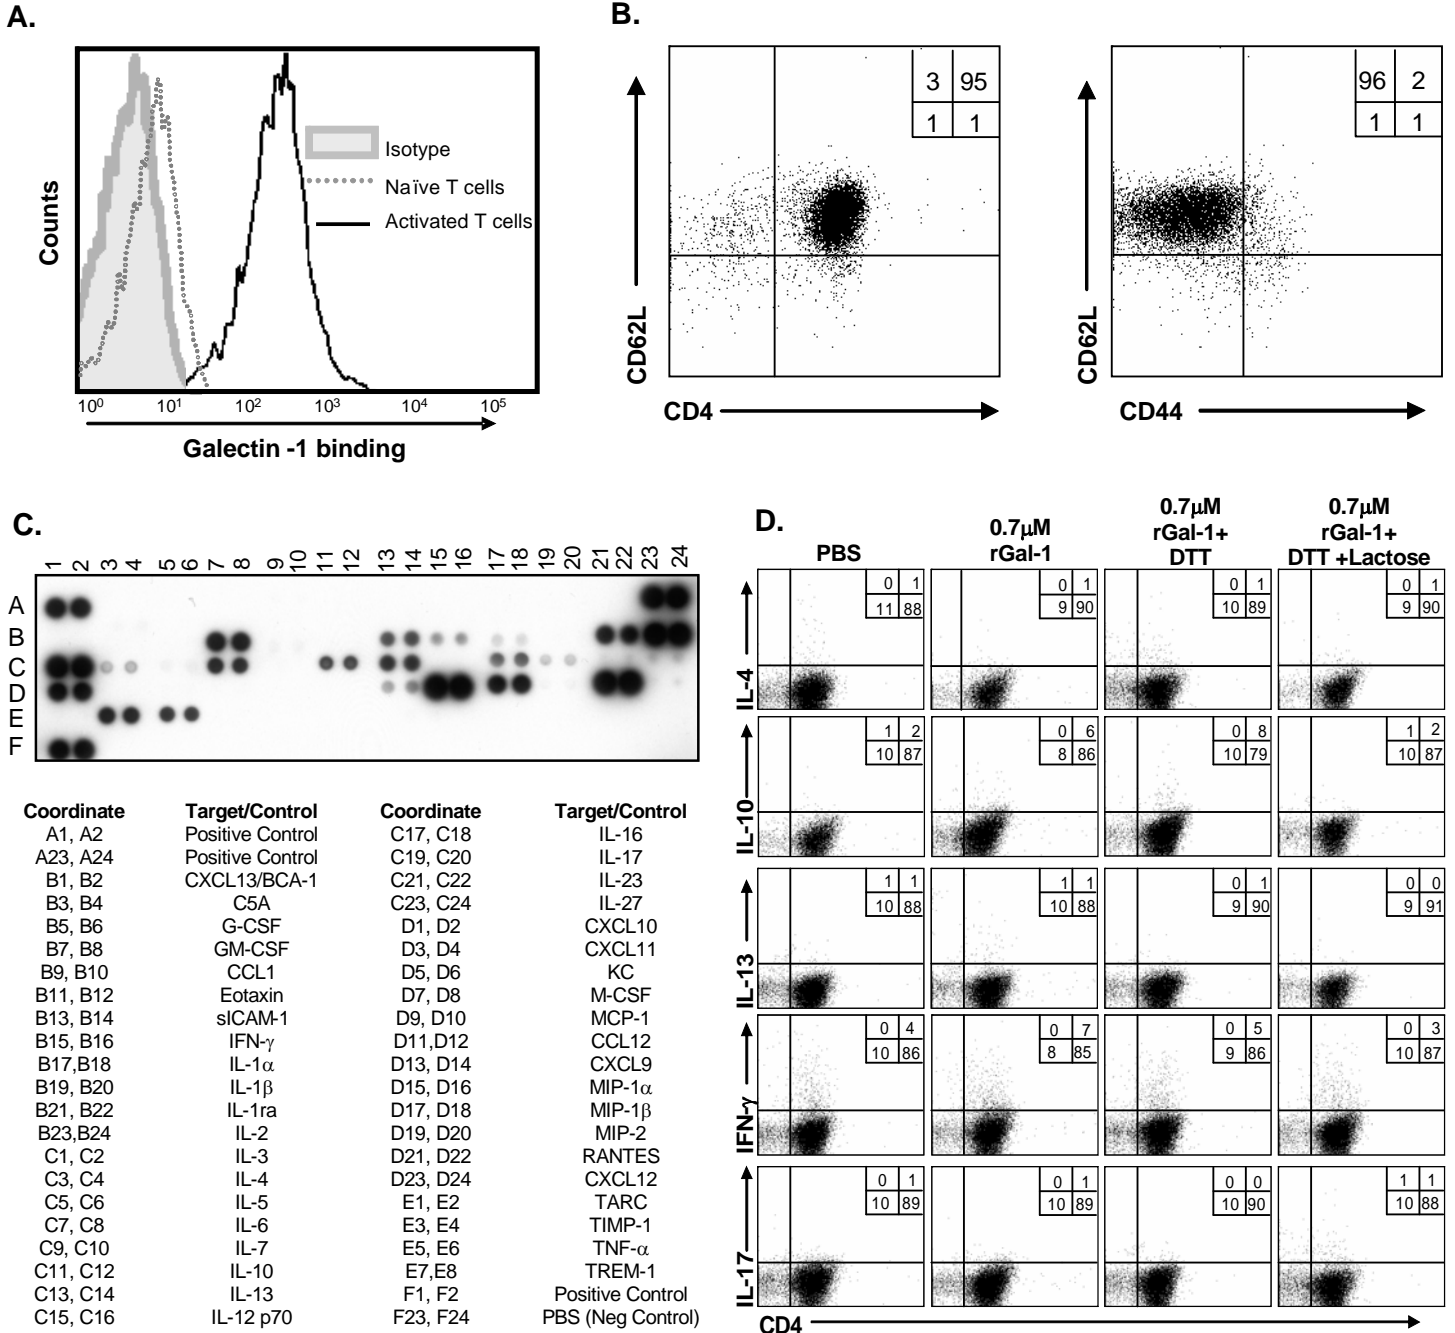

**Figure S3**

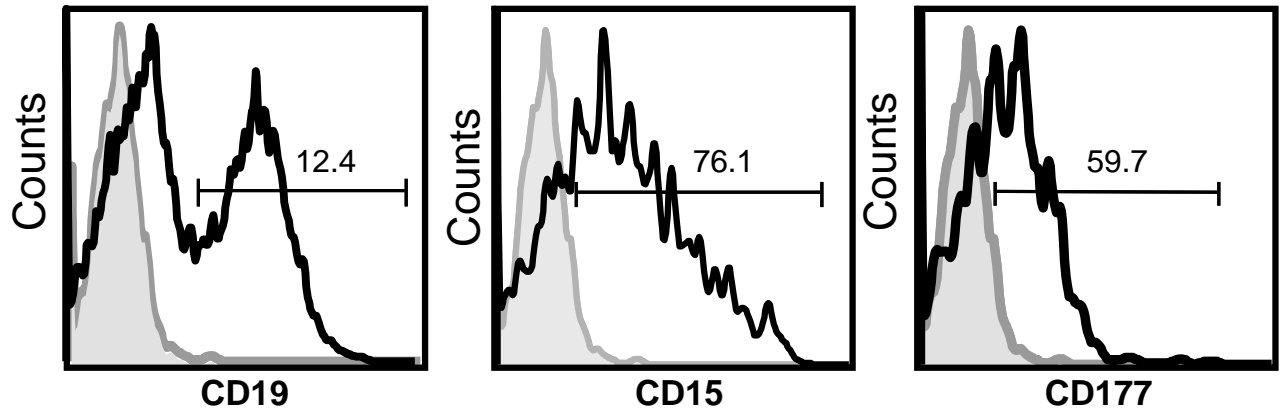

Supplement: NIHMS237042-supplement-Supplemental_Figures.pdf [file NIHMS237042-supplement-Supplemental_Figures.pdf]
